# Supplementary material
Source: PubMed Central journal article supplement (PMC7343307)

### Observed species

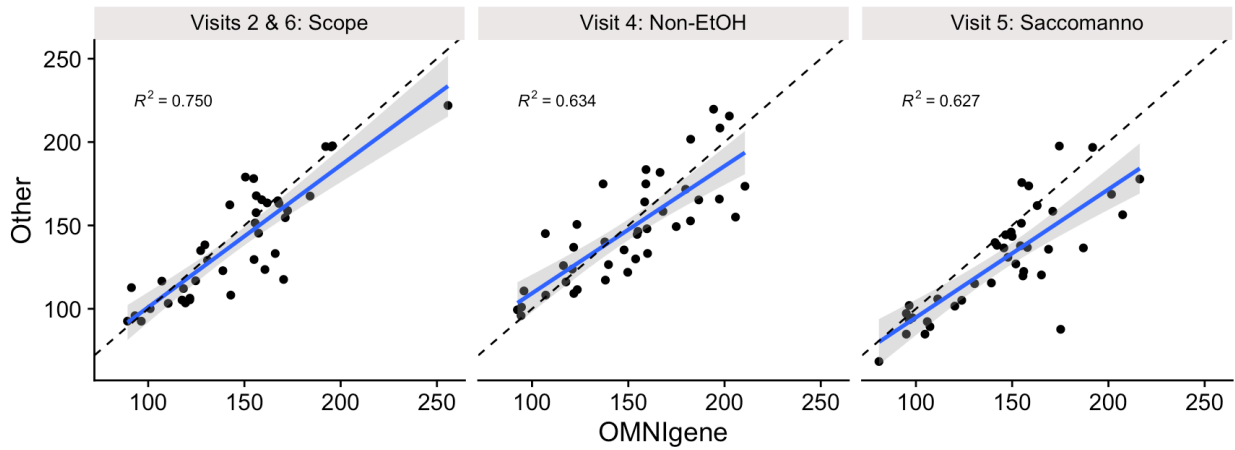

### Faith's PD

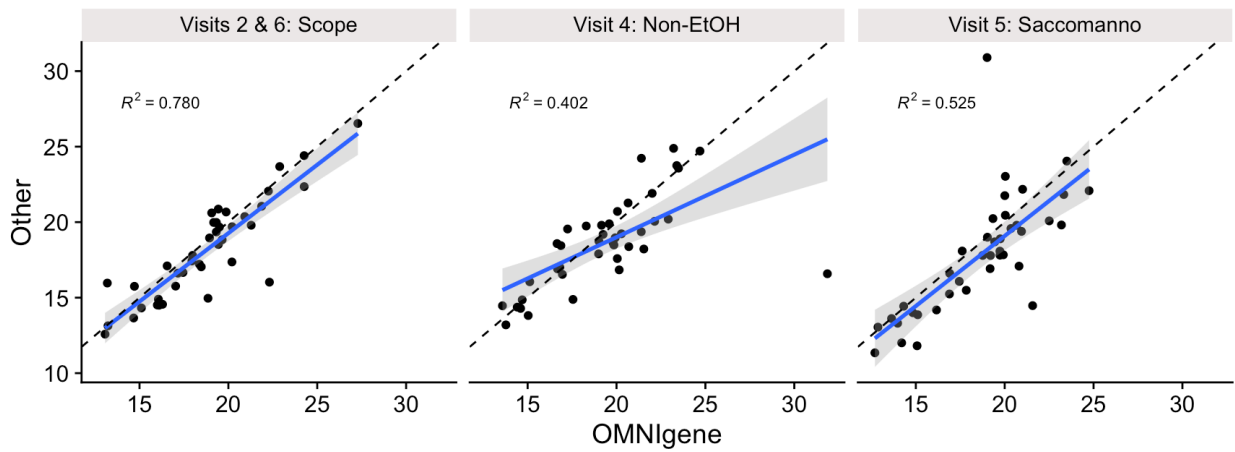

### Shannon index

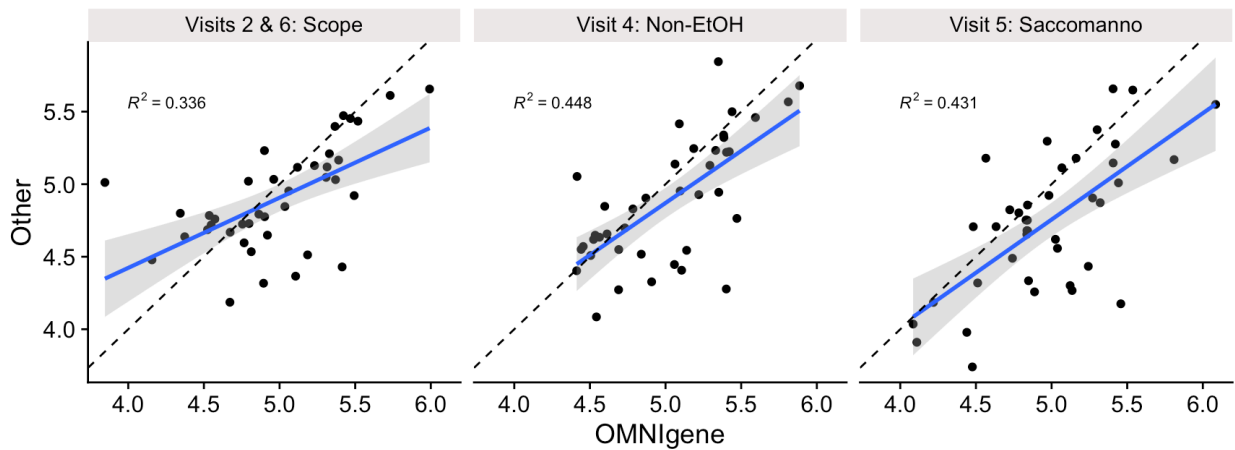

Supplement: mSystems.00156-20-sf001.pdf [file mSystems.00156-20-sf001.pdf]

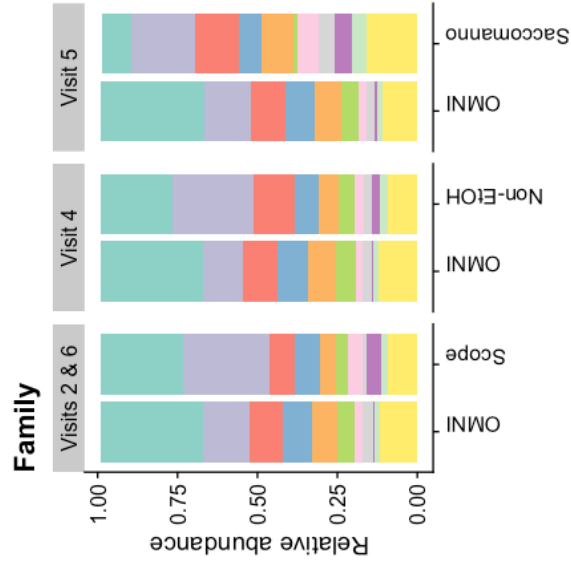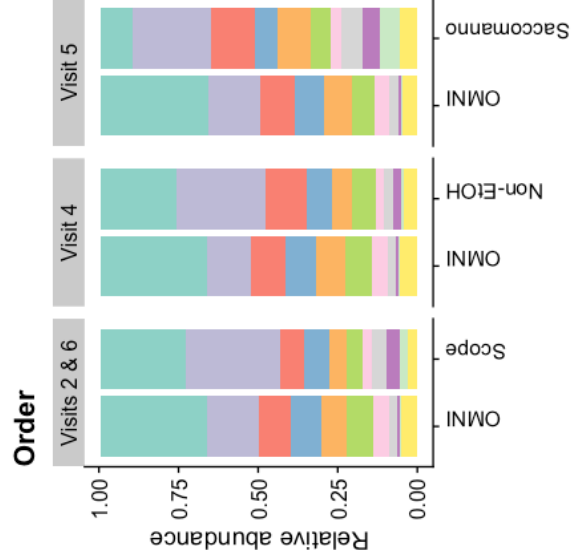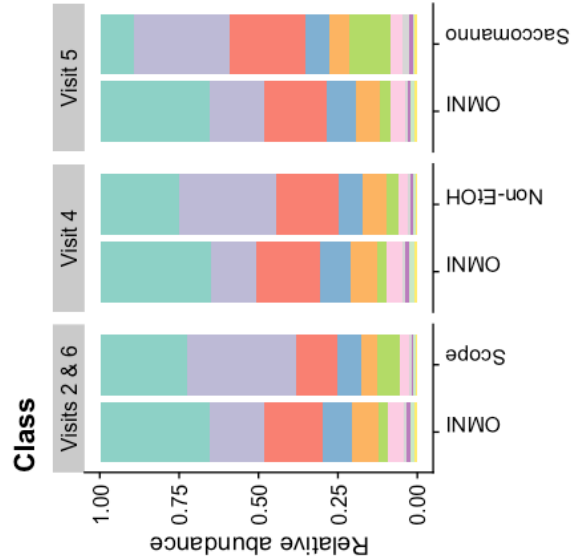

Supplement: mSystems.00156-20-sf002.pdf [file mSystems.00156-20-sf002.pdf]

### Class

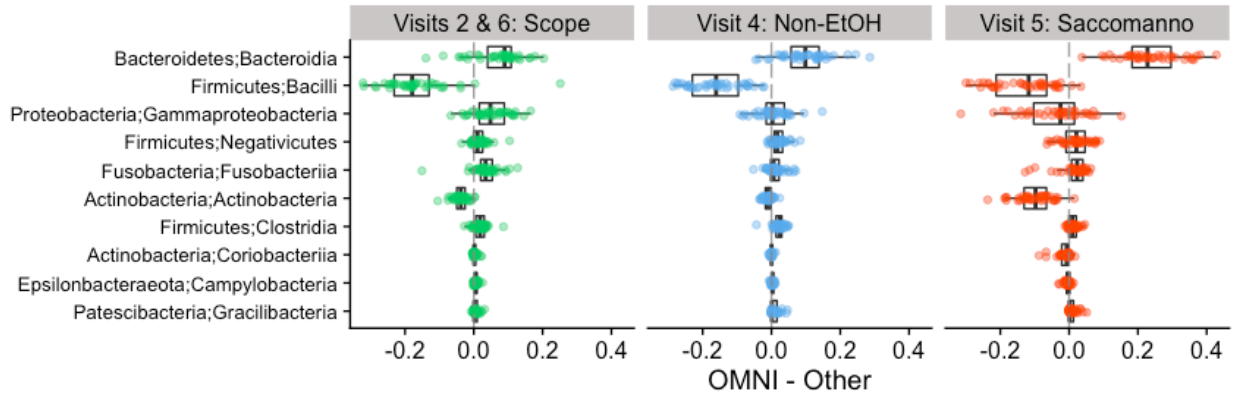

### Order

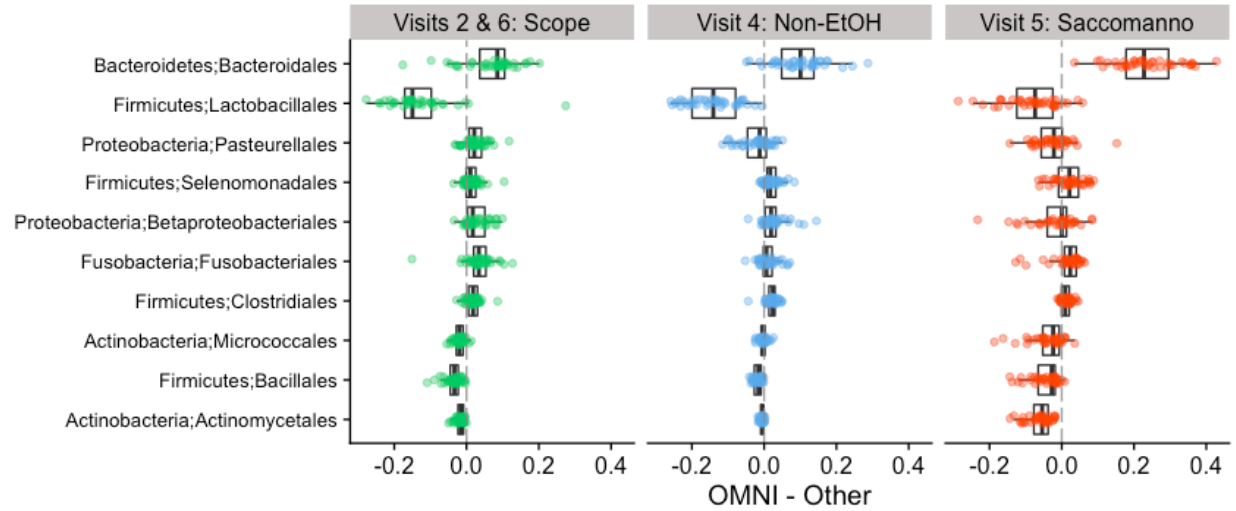

### Family

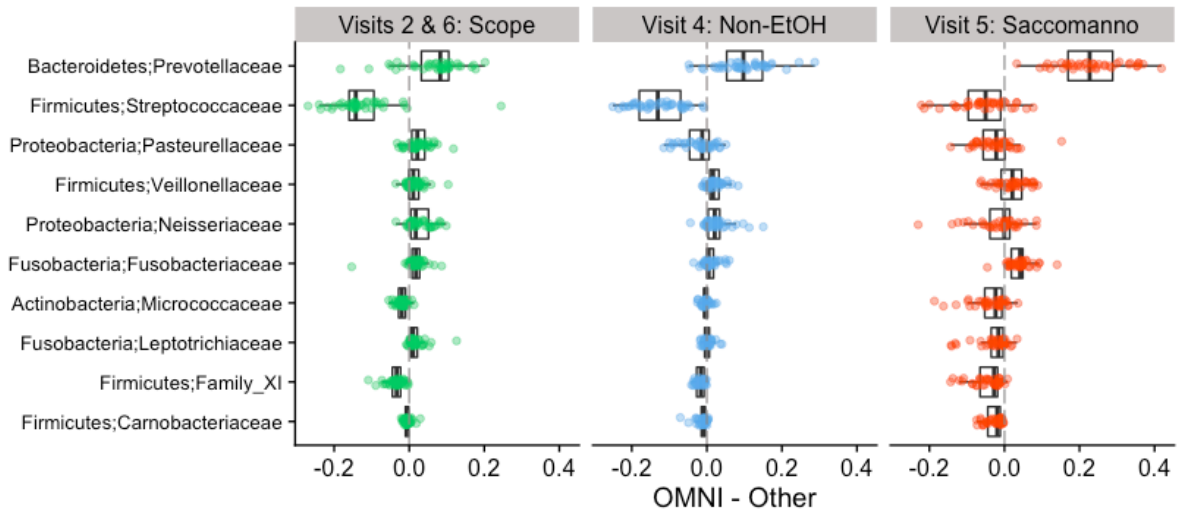

Supplement: mSystems.00156-20-sf003.pdf [file mSystems.00156-20-sf003.pdf]

### Rarefaction curve

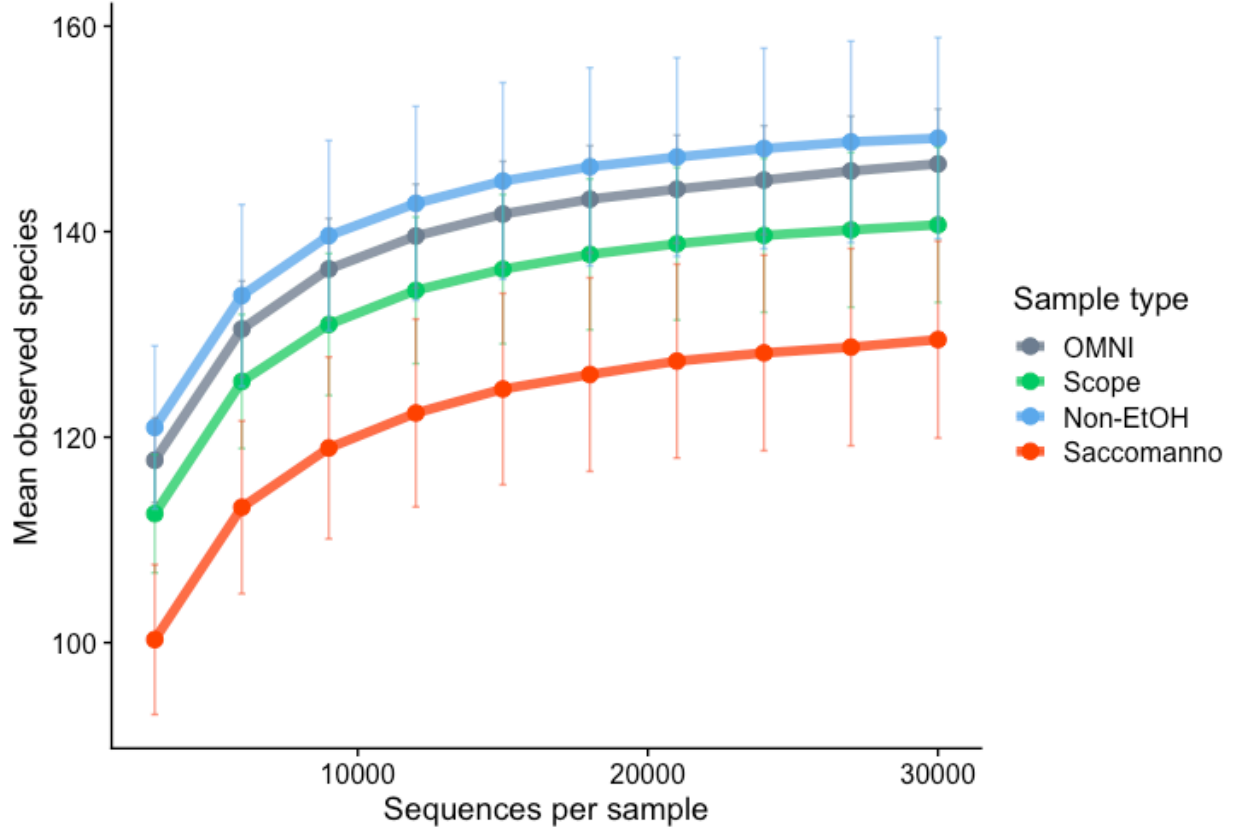

Supplement: mSystems.00156-20-sf004.pdf [file mSystems.00156-20-sf004.pdf]

**Bray-Curtis**

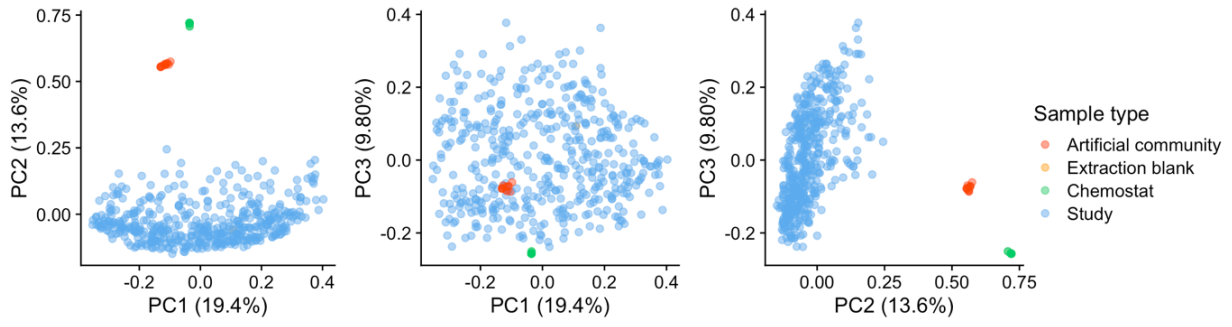

**Unweighted UniFrac**

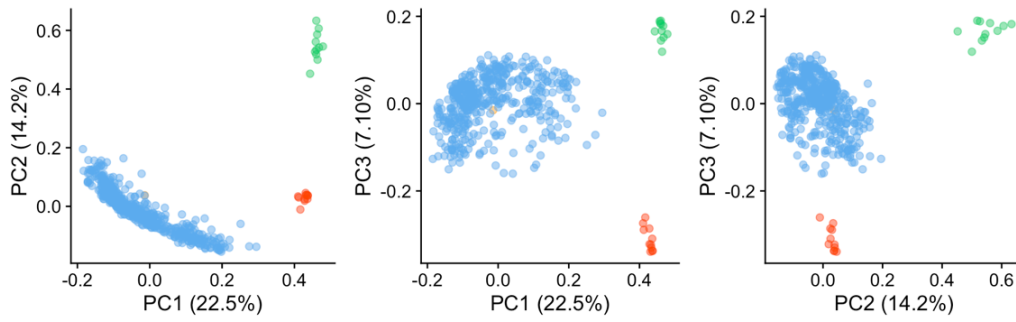

**Weighted UniFrac**

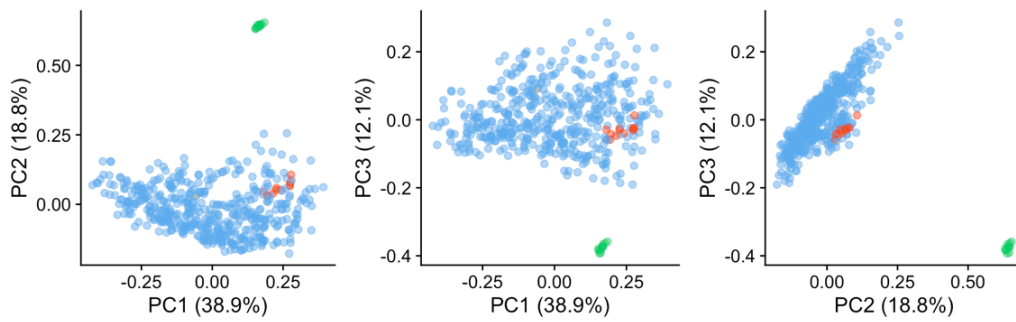

Supplement: mSystems.00156-20-sf005.pdf [file mSystems.00156-20-sf005.pdf]
